# Supplementary material for: Novel breast cancer screening: combined expression of miR-21 and MMP-1 in urinary exosomes detects 95% of breast cancer without metastasis
Source: PubMed Central journal article supplement (PMC6753125; doi:10.1038/s41598-019-50084-5), 2019-09-19
Supplement: 41598_2019_50084_MOESM1_ESM.pdf [file 41598_2019_50084_MOESM1_ESM.pdf]

## **Novel breast cancer screening: combined expression of miR-21 and MMP-1 in urinary exosomes detects 95% of breast cancer without metastasis**

Wataru Ando <sup>1</sup>, Kiyoshi Kikuchi <sup>2</sup>, Takayuki Uematsu <sup>3</sup>, Hiroaki Yokomori <sup>4</sup>, Takashi Takaki <sup>5</sup>, Masaya Sogabe <sup>6</sup>, Yutaka Kohgo <sup>7,8</sup>, Katsuya Otori <sup>1</sup>, Shigemi Ishikawa <sup>9</sup>, Isao Okazaki <sup>7,8,10</sup>

<sup>1</sup> Department of Clinical Pharmacy, Center for Clinical Pharmacy and Sciences, Kitasato University School of Pharmacy, 5-9-1 Shirokane, Minato-ku, Tokyo 108-8641, Japan, Tel +81-3440-3055

<sup>2</sup> Department of Surgery, Sanno Hospital, International University of Health and Welfare, 8-10-16 Akasaka, Minato-ku, Tokyo 107-0052, Japan, Tel +81-3-3402-3151

<sup>3</sup> Biomedical Laboratory, Division of Biomedical Research, Kitasato University Medical Center, 6-100 Arai, Kitamoto City, Saitama 364-8501, Japan, Tel +81-48-593-1212

<sup>4</sup> Department of Internal Medicine, Kitasato University Medical Center, 6-100 Arai, Kitamoto City, Saitama 364-8501, Japan, Tel +81-48-593-1212

<sup>5</sup> Division of Electron microscopy, Showa University School of Medicine, 1-5-8 Hatanodai, Shinagawa-ku, Tokyo 142-8555, Japan Tel +81-3-3784-8056

<sup>6</sup> Department of General Thoracic Surgery, Jichi Medical University, 3311-1 Yakushiji, Shimotsuke, Tochigi 329-0498, Japan, Tel +81-285-44-2111

<sup>7</sup> Department of Internal Medicine, International University of Health and Welfare Hospital, 537-3 Iguchi, Nasu-Shiobara, Tochigi 329-2763, Japan, Tel +81-287-39-3060

<sup>8</sup> Health Care Center, International University of Health and Welfare Hospital, 537-3 Iguchi, Nasu-Shiobara, Tochigi 329-2763, Japan, Tel +81-287-39-3060

<sup>9</sup> Department of Chest Surgery, International University of Health and Welfare Hospital, 537-3 Iguchi, Nasu-Shiobara, Tochigi 329-2763, Japan, +81-287-39-3060

<sup>10</sup> Department of Internal Medicine, Sanno Hospital, International University of Health and Welfare, 8-10-16 Akasaka, Minato-ku, Tokyo 107-0052, Japan, Tel +81-3-3402-3151

### **Supplementary Materials**

**Supplementary Table 1.** Breast Cancer Cases, Characteristics of Pathology and Clinical Data

| No. | ER (%) | PR (%) | Her2 | CEA (ng/ml) | CA 15-3 (U/ml) | CRNN (mg/dl) | Alcohol (g/day) | Tabaco (cigarettes /day) |
|-----|--------|--------|------|-------------|----------------|--------------|-----------------|--------------------------|
| 1   | <1     | <1     | 0    | 1.2         | 16.9           | 0.69         | —               | —                        |
| 2   | 0      | 0      | 3    | 1.1         | 10.6           | 0.76         | —               | —                        |
| 3   | >90    | 90     | 1+   | 0.7         | 7.4            | 0.66         | 20              | —                        |
| 4   | >90    | 90     | 0    | 1.6         | 5.7            | 0.50         | —               | —                        |
| 5   | 0      | 0      | 0    | 1.6         | 26             | 0.53         | —               | —                        |
| 6   | <1     | <1     | 3+   | 2.6         | 16.8           | 0.60         | —               | —                        |
| 7   | >90    | >90    | 0    | 1.9         | 18.8           | 0.66         | —               | —                        |
| 8   | 80-90  | 70-80  | 0    | 1.2         | 9.5            | 0.75         | —               | —                        |
| 9   | >90    | >90    | 1+   | 1.6         | 7.9            | 0.60         | 40<br>g/week    | —                        |
| 10  | >90    | >90    | 1+   | 4.8         | 26             | 0.81         | —               | —                        |
| 11  | >80    | >90    | 1+   | 1.3         | 8.8            | 0.62         | 20              | —                        |
| 12  | >90    | >90    | 1+   | 1.2         | 6.4            | 0.68         | 43              | —                        |
| 13  | 50     | 5      | 2+   | 2.6         | 10.6           | 0.50         | —               | —                        |
| 14  | 0      | 0      | 0    | 2           | 9.1            | 0.66         | —               | —                        |
| 15  | 50     | 5      | 2+   | 1           | 7.5            | 0.52         | 16              | —                        |
| 16  | >90    | >90    | 1+   | 1.8         | 11.2           | 0.75         | 20              | —                        |
| 17  | 0      | 0      | 0    | 3           | 16.3           | 0.70         | 20              | —                        |
| 18  | >90    | >90    | 0    | 3.4         | 5.5            | 0.45         | —               | —                        |
| 19  | 80     | 50     | 1+   | 1.7         | 46.1           | 0.41         | —               | —                        |
| 20  | >90    | >90    | 1+   | 2.3         | 8.3            | 0.54         | 20              | —                        |
| 21  | >90    | >90    | 0    | 1.4         | 19.7           | 0.60         | —               | —                        |
| 22  | 80     | 30     | 0    | 1.2         | 16.9           | 0.58         | —               | —                        |

ER, Oestrogen receptor; PR, progesterone receptor; Her2, human epidermal growth factor receptor 2; CEA, Carcinoembryonic antigen; CA 15-3, carbohydrate antigen 15-3; CRNN, serum creatinine;

**Supplementary Table 2.** The Characteristics of Healthy Controls

| No. | Age (years) | Body Weight (kg) | BMI (kgm <sup>2</sup> ) | Expression Levels of miR-21 (2 <sup>ΔCt</sup> *) | Expression Levels of MMP-1/CD63** | CRNN (mg/dl) | Alcohol (g/day) | Tabaco (cigarettes /day)    |
|-----|-------------|------------------|-------------------------|--------------------------------------------------|-----------------------------------|--------------|-----------------|-----------------------------|
| 1   | 34          | 50.0             | 20.6                    | 1.34                                             | 0.40                              | 0.71         | -               | -                           |
| 2   | 36          | 58.0             | 21.7                    | 0.68                                             | 1.31                              | 0.56         | -               | -                           |
| 3   | 33          | 47.5             | 18.7                    | 0.97                                             | 0.20                              | 0.59         | 20              | -                           |
| 4   | 35          | 43.0             | 21.1                    | 0.18                                             | 0.30                              | 0.6          | -               | -                           |
| 5   | 38          | 54.3             | 21.8                    | 0.50                                             | 0.14                              | 0.72         | Sometime<br>20  | -                           |
| 6   | 45          | 54.1             | 22.1                    | 0.35                                             | 0.15                              | 0.54         | -               | -                           |
| 7   | 49          | 50.0             | 17.9                    | 1.69                                             | 0.56                              | 0.51         | -               | -                           |
| 8   | 47          | 52.1             | 21.4                    | 0.46                                             | 0.86                              | 0.56         | -               | -                           |
| 9   | 48          | 68.8             | 23.2                    | 0.29                                             | 0.71                              | 0.67         | 20              | -                           |
| 10  | 44          | 44.6             | 19.2                    | 0.15                                             | 0.90                              | 0.51         | -               | -                           |
| 11  | 44          | 68.0             | 25.2                    | 0.03                                             | 18.31                             | 0.51         | -               | -                           |
| 12  | 45          | 52.4             | 23.3                    | 1.59                                             | 2.86                              | 0.46         | -               | 11~20                       |
| 13  | 41          | 62.7             | 24.5                    | 7.17                                             | 2.24                              | 0.54         | -               | -                           |
| 14  | 45          | 54.6             | 22.1                    | 4.75                                             | 0.5                               | 0.76         | 43              | -                           |
| 15  | 40          | 59.4             | 16.6                    | 3.29                                             | 0.5                               | 0.63         | Sometime<br>20  | -                           |
| 16  | 42          | 65.8             | 24.6                    | 6.65                                             | 0.56                              | 0.84         | -               | -                           |
| 17  | 49          | 58.2             | 24.3                    | 0.27                                             | 0.51                              | 0.56         | 60              | 20                          |
| 18  | 55          | 48.9             | 20.6                    | 0.63                                             | 0.91                              | 0.66         | -               | -                           |
| 19  | 56          | 49.1             | 19.3                    | 0.45                                             | 0.96                              | 0.62         | 20              | -                           |
| 20  | 54          | 59.3             | 22.8                    | 1.03                                             | 0.43                              | 0.75         | 43              | No, but<br>past 10<br>years |
| 21  | 52          | 58.2             | 24.3                    | 1.41                                             | 0.42                              | 0.56         | 30              | No, but<br>past 5<br>years  |
| 22  | 50          | 53.6             | 21.7                    | 8.78                                             | 0.29                              | 0.69         | 43              | -                           |
| 23  | 69          | 50.2             | 20.2                    | 1.69                                             | 0.35                              | 0.66         | -               | -                           |
| 24  | 71          | 49.8             | 21.2                    | 0.09                                             | 0.78                              | 0.99         | -               | -                           |
| 25  | 71          | 61.6             | 25.2                    | 10.60                                            | 0.36                              | 0.62         | Sometime<br>20  | -                           |
| 26  | 73          | 54.6             | 23.1                    | 1.98                                             | 0.61                              | 0.68         | -               | -                           |

\*number indicates the relative expression levels, that is microRNA copies by RT-PCR in patients divided

the mean number of microRNA copies in 26 healthy controls.

\*\*number indicates the relative expression levels of MMP-1/CD63, that was measured by western blotting by both antibodies.

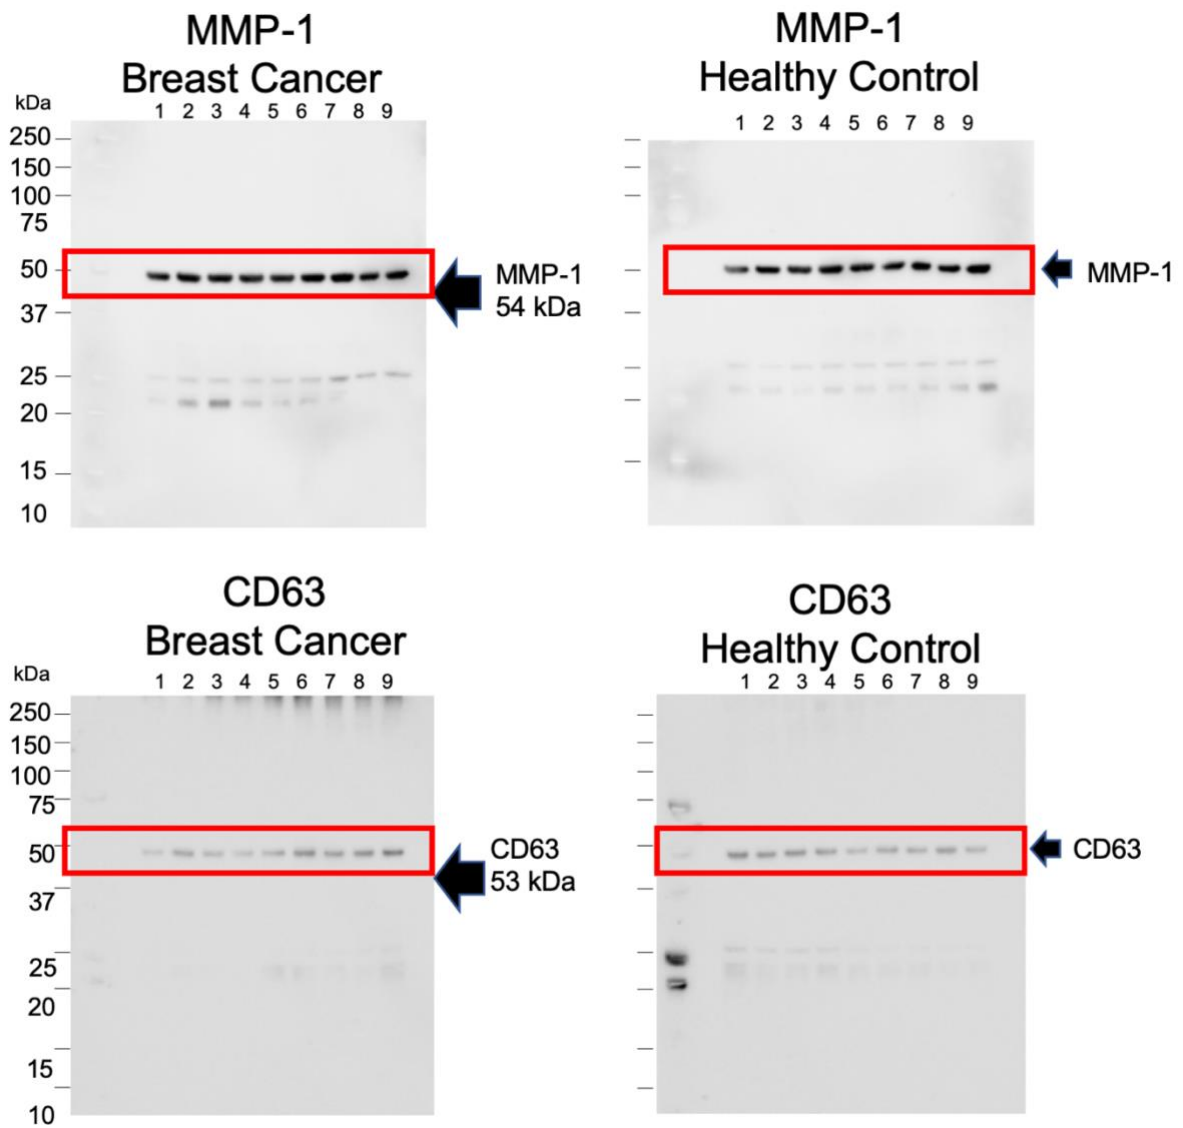

**Supplementary Figure 1.** The full-length blot of western blotting analysis in the protein from exosome with anti-MMP-1 and anti-CD63 antibody. The red-enclosed section was used for Figure 3.
